# Supplementary material
Source: MDPI journal article supplement (https://www.mdpi.com/2073-4441/12/2/398)
Supplement: s1 [file s1]

## Supplementary Materials

### Supplementary figures:

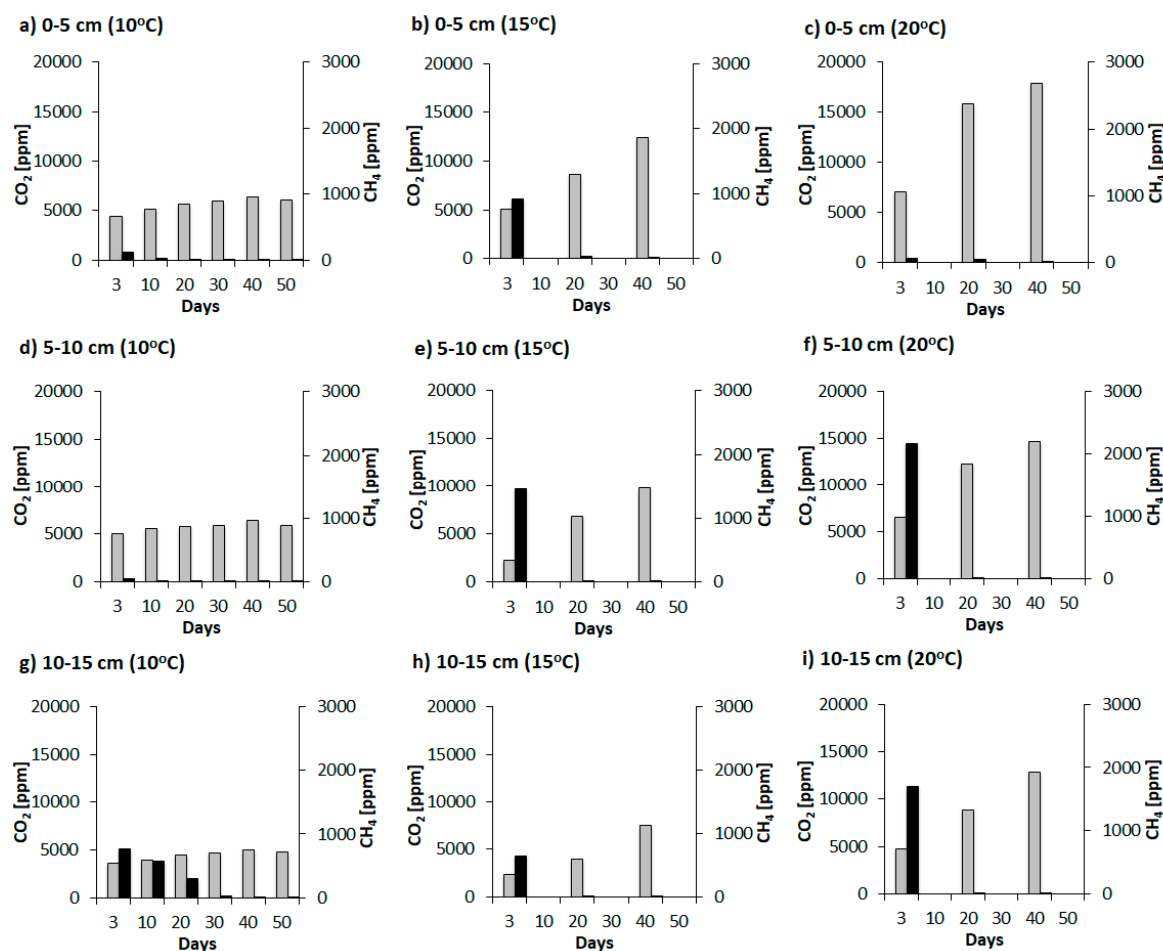

**Figure S1.** Changes in concentration of CH<sub>4</sub> (black) and CO<sub>2</sub> (grey) over time, in the different sediment layers and at different temperatures (He+<sup>13</sup>CH<sub>4</sub>).

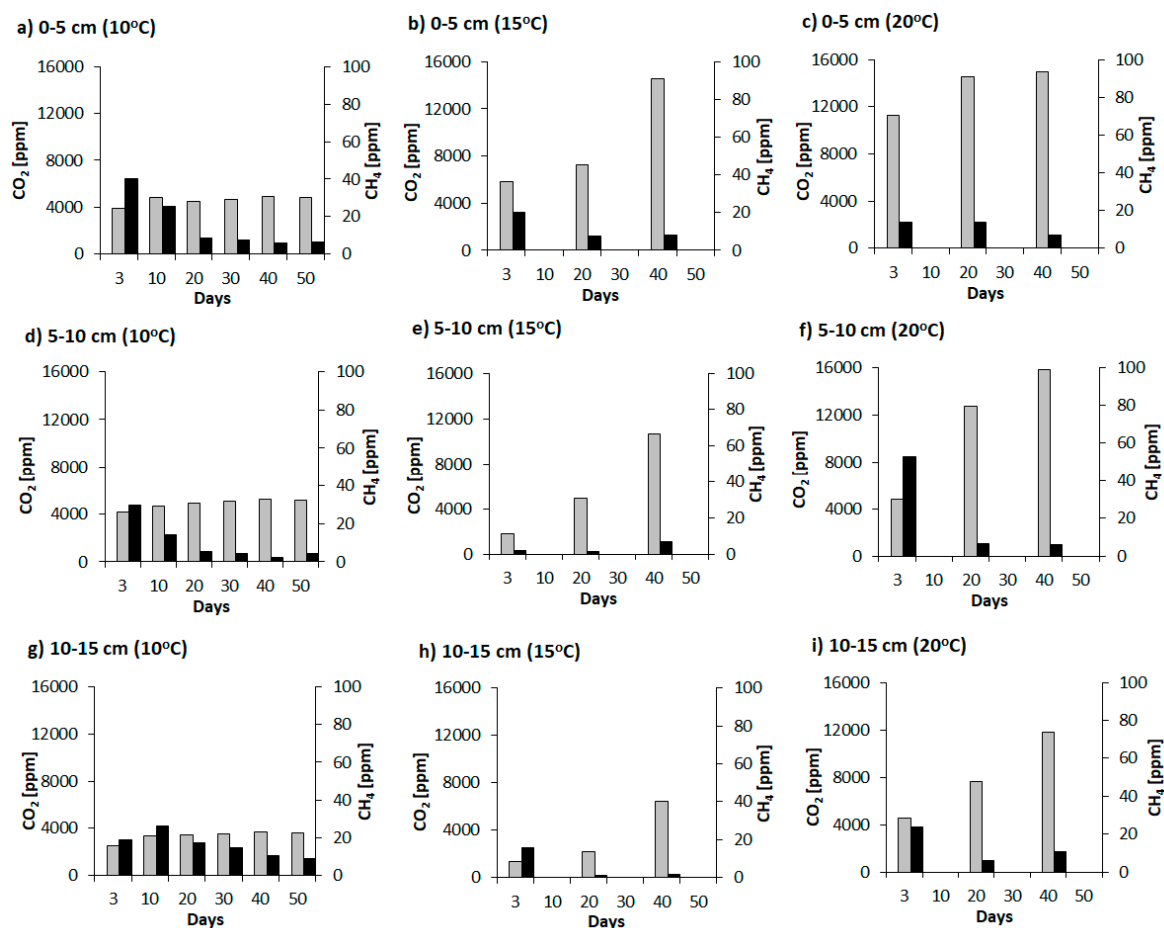

**Figure S2.** Changes in concentration of CH<sub>4</sub> (black) and CO<sub>2</sub> (grey) over time, in the different sediment layers and at different temperatures (He).

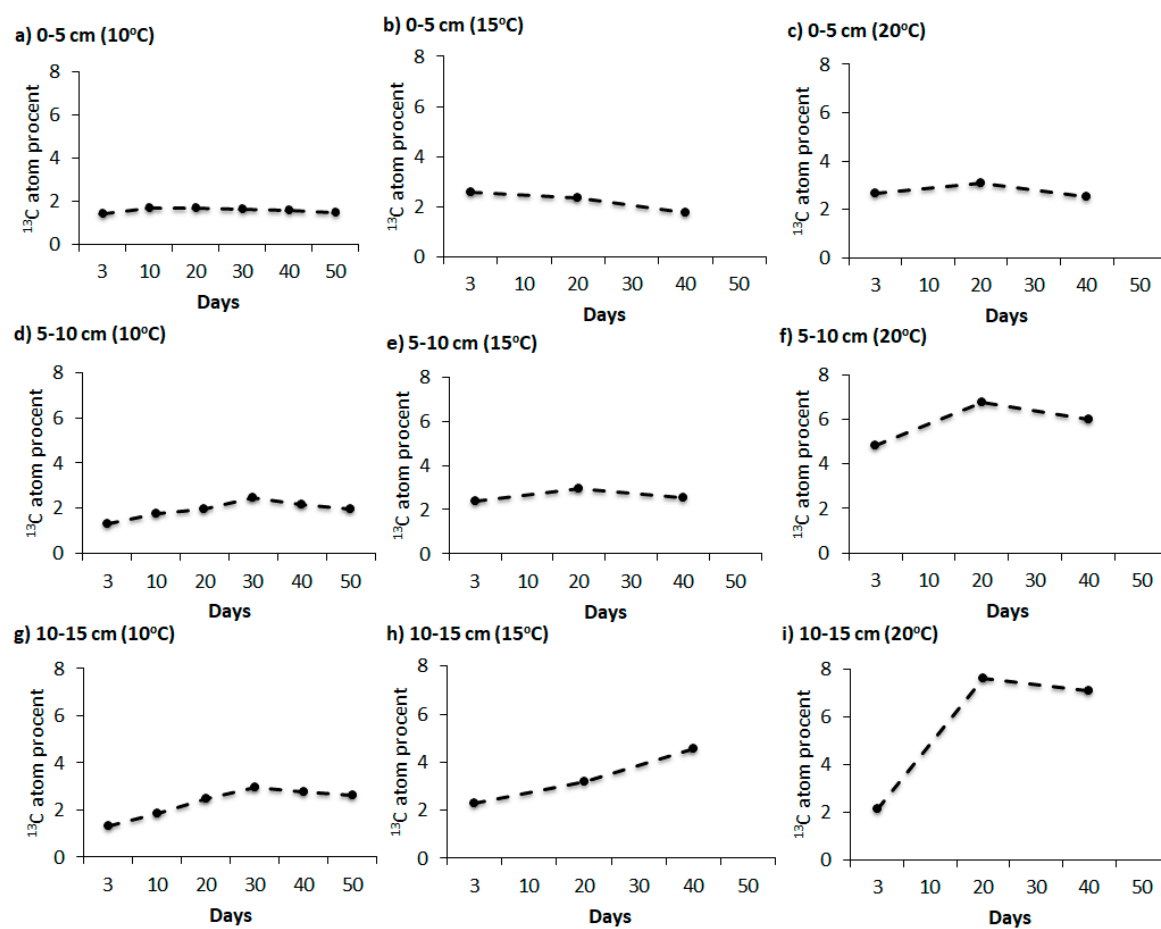

**Figure S3.** Change of  $^{13}\text{C}$  AP over time for incubations conducted at different temperatures in the 0-5, 5-10 and 10-15 cm sediment layers ( $\text{He}+^{13}\text{CH}_4$ ).
